# Supplementary material for: Understanding the fast kinetics and mechanism of sodium storage in antimony using ab initio grand canonical Monte Carlo simulation and operando X-ray scattering
Source: Royal Society of Chemistry journal article supplement (doi:10.1039/d3ta06832c), 2024-01-01
Supplement: d3ta06832c1.pdf [file d3ta06832c1.pdf]

**Understanding the Fast Kinetics and Mechanism of Sodium Storage in Antimony Using  
ab Initio Grand Canonical Monte Carlo Simulation and Operando X-ray Scattering**

Manni Li,<sup>1,4,#</sup> Tian Qiu,<sup>2,3,#</sup> Samuel S. Welborn,<sup>1,3</sup> Alexandre C. Foucher,<sup>1</sup> Jintao Fu,<sup>1</sup>  
Benjamin K. Lesel,<sup>5</sup> Zeyu Wang,<sup>1,6</sup> Lin Wang,<sup>1</sup> Eric A. Stach,<sup>1,3</sup> Andrew M. Rappe,<sup>2,3,\*</sup> Eric  
Detsi.<sup>1,3,\*</sup>

<sup>1</sup>*Department of Materials Science & Engineering, University of Pennsylvania, Philadelphia, Pennsylvania 19104, USA*

<sup>2</sup>*Department of Chemistry, University of Pennsylvania, Philadelphia, Pennsylvania 19104-6323, USA*

<sup>3</sup>*Vagelos Institute for Energy Science and Technology (VIEST), Philadelphia, Pennsylvania 19104, USA*

<sup>4</sup>*Automotive Engineering Research Institute, Jiangsu University, Zhenjiang 212013, China*

<sup>5</sup>*NanoDian, Los Angeles, California 90095, USA*

<sup>6</sup>*School of Materials Science & Engineering, Jiangsu University, Zhenjiang 212013, China*

# *Equal contribution*

\* *Corresponding authors: ED [detsi@seas.upenn.edu](mailto:detsi@seas.upenn.edu), AMR [rappe@sas.upenn.edu](mailto:rappe@sas.upenn.edu)*

## Detailed balance for the modified ab initio grand canonical Monte Carlo (aiGCMC)

**simulation:** The partition function of the  $\mu_1, N_2, p, T$  ensemble is

$$Z(\mu_1, N_2, p, T) = \sum_{N_1} \frac{1}{N_1! N_2! h^{N_1 + N_2}} \int dV \int d\vec{x} d\vec{p} e^{-\beta(H - \mu_1 N_1 + pV)}$$

where  $h$  is the Plank constant,  $V$  is the volume of the system,  $\vec{x}$  and  $\vec{p}$  are the positions and momenta of all particles in the system, respectively. Define

$$z(N_1, N_2, p, T; \mu_1) = \frac{1}{N_1! N_2! h^{N_1 + N_2}} \int dV \int d\vec{x} d\vec{p} e^{-\beta(H - \mu_1 N_1 + pV)}$$

The Hamiltonian is the sum of the kinetic energy  $T$  and the potential energy  $U$ . Since the potential energy of a bulk system increases rapidly as the coordinates of atom deviates from the optimal position, here we only consider small deviations to the relaxed structure in the integral over  $\vec{x}$ , and therefore, the potential energy can be approximated as a quadratic form in  $V$ :

$$U \approx U|_{V=V_0} + \frac{\partial^2 U}{2\partial V^2} (V - V_0)^2$$

where  $V_0$  is the volume of the optimal structure, i.e. fully relaxed structure of the given number of atoms. Define

$$B = \frac{\partial^2 U}{2\partial V^2}$$

Then

$$z(N_1, N_2, p, T; \mu_1) \approx \frac{1}{N_1! N_2! h^{N_1 + N_2}} \int d\vec{x} d\vec{p} e^{-\beta(H - \mu_1 N_1)} \Big|_{V=V_0} \int dV e^{-\beta(B(V - V_0)^2 + pV)}$$

For  $\beta B V_0^2 \gg 1$ ,

$$\int dV e^{-\beta(B(V - V_0)^2 + pV)} = \sqrt{\frac{\pi}{\beta B}} e^{-\beta\left(pV_0 - \frac{p^2}{4B}\right)}$$

Therefore

$$z(N_1, N_2, p, T; \mu_1) = q(N_1, N_2, V = V_0, T) e^{\beta\mu_1 N_1} \sqrt{\frac{\pi}{\beta B}} e^{-\beta\left(pV_0 - \frac{p^2}{4B}\right)}$$

where  $q(N_1, N_2, V, T)$  is the partition function of the canonical ensemble:

$$q(N_1, N_2, V, T) = \frac{1}{N_1! N_2! \Lambda^{N_1} \Lambda^{N_2}} \int d\vec{s} e^{-\beta U(\vec{s})}$$

The integral is over the reduced coordinates  $\vec{s} = \frac{\vec{x}}{V}$ . For the solid-state system under ambient

pressure,  $e^{-\beta\left(pV_0 - \frac{p^2}{4B}\right)} \approx 1$ . Hence,

$$z(N_1, N_2, p, T; \mu_1) \approx \frac{1}{N_1! N_2! \Lambda_1^{3N_1} \Lambda_2^{3N_2}} \int d\vec{s} e^{-\beta(U(\vec{s}) - \mu_1 N_1)} \sqrt{\frac{\pi}{\beta B}}$$

where  $\Lambda_1$  and  $\Lambda_2$  are the thermal de Broglie wavelength of the corresponding elements. In each iteration of the modified aiGCMC simulation, we choose to i) add one atom into the system, or ii) remove one atom from the system, or iii) switch the positions of two different atoms. Under the detailed balance condition, the acceptance probability of each choice is as follows:

i) For adding one atom:

$$P_{add} = \min\left\{1, \frac{1}{N_1 + 1} \frac{V_0^{new}}{\Lambda_1^3} \left(\frac{V_0^{new}}{V_0^{old}}\right)^{N_1} \sqrt{\frac{B^{old}}{B^{new}}} e^{-\beta(\Delta U - \mu_1)}\right\}$$

where  $V_0$  is the volume of the relaxed system. The superscript “new” and “old” denote to which system the quantity is correspond (here “new” stands for the system with  $N_1 + 1$  atoms and “old” stands for the system with  $N_1$  atoms).

$$\Delta U = U^{new} - U^{old}$$

ii) For removing one atom:

$$P_{remove} = \min\left\{1, N_1 \frac{\Lambda_1^3}{V_0^{new}} \left(\frac{V_0^{new}}{V_0^{old}}\right)^{N_1} \sqrt{\frac{B^{new}}{B^{old}}} e^{-\beta(\Delta U + \mu_1)}\right\}$$

iii) For switching the positions of two atoms:

$$P_{switch} = \min\{1, e^{-\beta\Delta U}\}$$

In practical simulation, the square root of the ratio in  $B$  is treated as 1 to avoid frequent calculation of the bulk modulus.

**SEM images of Sb with a bimodal porosity:** Typical SEM images are displayed at different magnifications in **Figs. S1a-c** for the hierarchical nanoporous Sb. At low magnifications, large ligament/pore structures with size between  $\sim 100\text{-}300$  nm can be observed (**Figs. S1a** and **S1b**). In turn, at high magnifications, the large ligaments are found to be composed of mesoscopic ligaments and pores with average size  $\sim 10$  nm

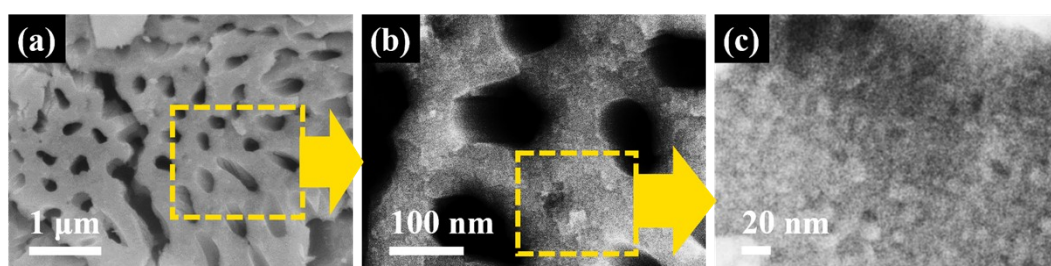

**Fig. S1.** SEM images of hierarchical nanoporous Sb at different magnifications. Large ligament/pore structures with size between 100-300 nm can be observed at low magnifications (a,b). At a high magnification (c), it is found that the large ligaments are in turn composed of mesoscopic ligaments and pores with average size  $\sim 10$  nm.

(Fig. S1c),

**Energy dispersive X-ray spectroscopy (EDX):** As shown in **Fig. S2**, the residual Mn content was not detectable in EDX, suggesting that the Mn was almost fully removed after dealloying. The oxygen and carbon signal come from the carbon conductive tape used to hold the sample during EDX characterization, and the oxygen signal detected after dealloying may come from the dealloying process in addition to the carbon tape. As shown in **Table S1**, The atom ratio between Sb and Mn changes from ~10:90 before dealloying to ~98:2 after dealloying.

**Table S1.** Chemical composition of Mn-Sb parent alloy and dealloyed sample

| Sample                 | Chemical composition (at. %) |      |
|------------------------|------------------------------|------|
|                        | Sb                           | Mn   |
| Sb-Mn parent alloy     | 9.6                          | 90.4 |
| NP-Sb after dealloying | 98.2                         | 1.8  |

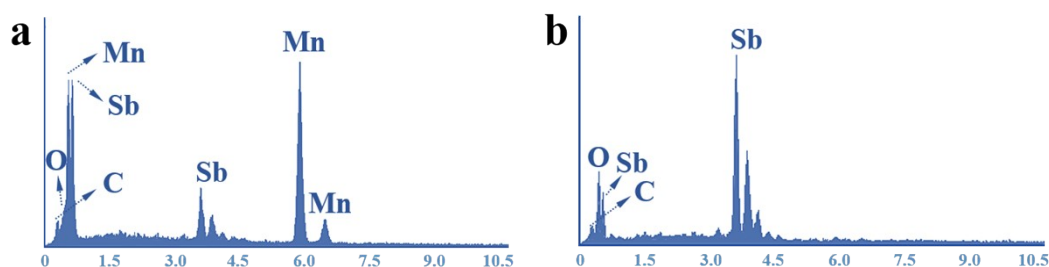

**Fig. S2.** EDX spectrum of  $Sb_{90}Mn_{10}$  at.% before dealloying and (b) corresponding EDX spectrum of NP-Sb after dealloying.

**Electrochemical impedance spectroscopy (EIS):** The semicircle diameter reduced from  $\sim 700 \Omega$  in the first cycle down to  $\sim 300 \Omega$  in the second cycle, and was stable at  $\sim 150 \Omega$  after the second cycle. The large charge transfer and reaction resistance can be attributed to the SEI formation. After the first cycle, the Sb grains were pulverized due to the volume change, leading to more area to react with sodium ions and thus fast charge-transfer.

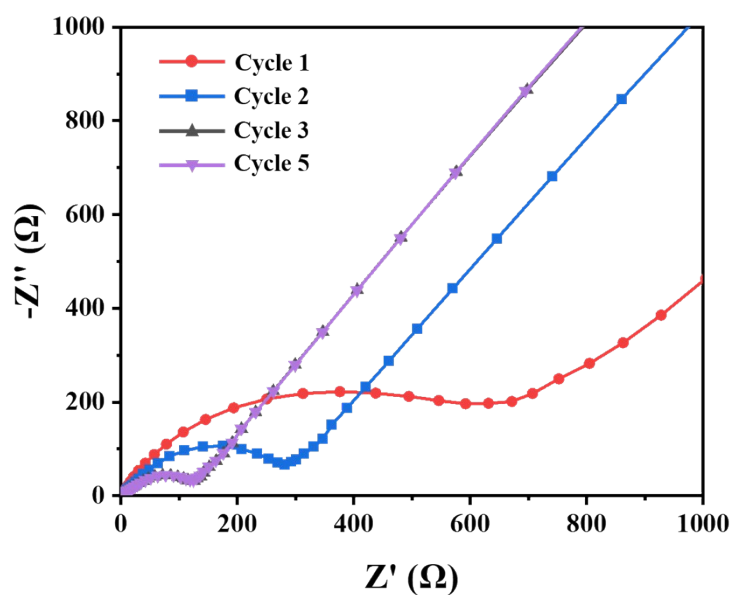

*Fig. S3. Nyquist plot of NP-Sb after several representative cycles.*

### Coin cell configuration for the operando X-ray scattering experiment

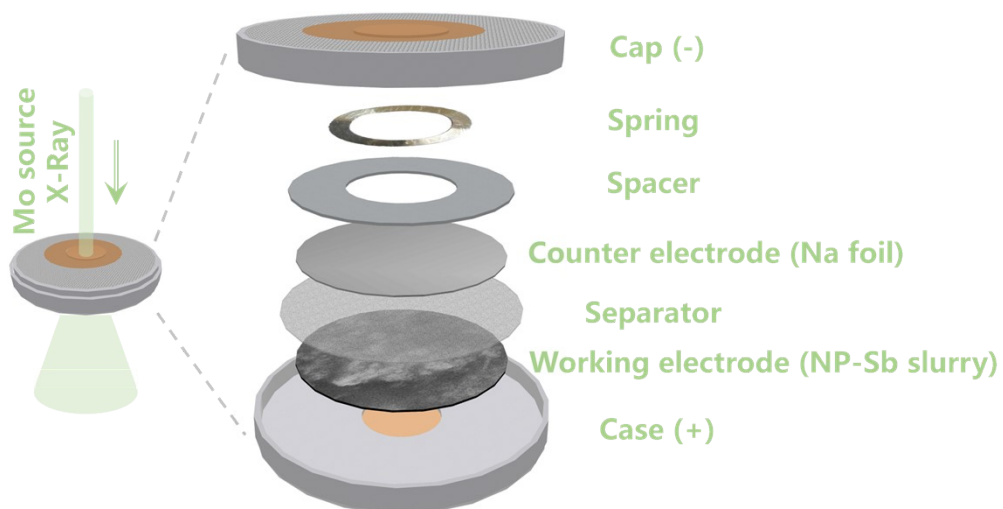

**Fig. S4.** Coin cell configuration used for operando WAXS measurements.

**Kinetic analysis:** As shown in Fig. S5, the capacitive process contributes 39.2% of the total capacity at the scan rate of 0.1  $\text{mV s}^{-1}$ , and gradually increase to 81.8% when the scan rate grows to 5  $\text{mV s}^{-1}$ , illustrating that the capacitive process occupies a greater proportion of the total capacity when scanning at high rates.

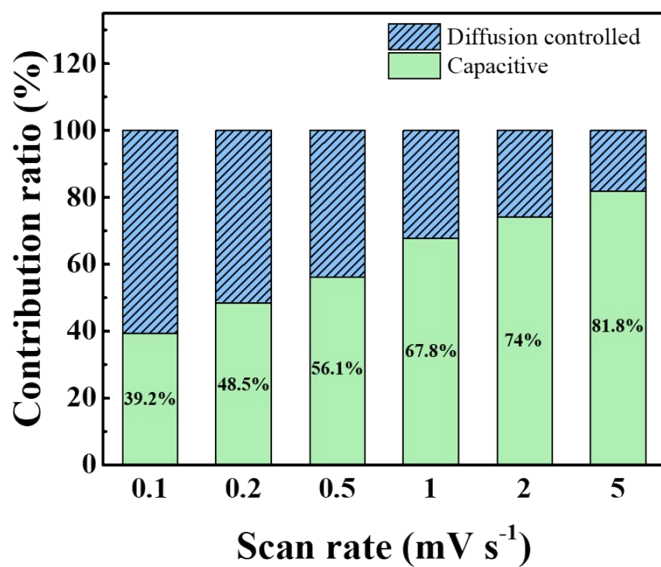

**Fig. S5.** The contribution ratio of the capacitive and diffusion-controlled at various scan rates.

**Dynamical stability of the structures in Figure 3:** The phonon dispersion calculations have been performed for all structures in Figure 3, the results are displayed as phonon density of state (DOS) show in Fig. S6

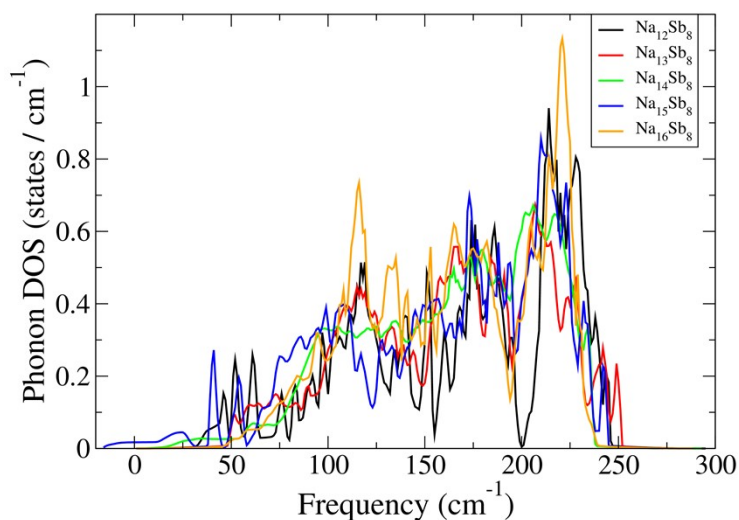

**Fig. S6.** The phonon DOS for structures from  $\text{Na}_{12}\text{Sb}_8$  to  $\text{Na}_{16}\text{Sb}_8$ .  $\text{Na}_{15}\text{Sb}_8$  has negative phonon frequencies but the result of structures are all dynamically stable.



**Geometries of structures in .xsf format:**

Na<sub>12</sub>Sb<sub>8</sub>:

PRIMVEC

|              |              |              |
|--------------|--------------|--------------|
| 10.305409821 | -1.563713530 | -0.599710451 |
| -0.975221135 | 6.250731794  | -0.090167754 |
| 0.987462025  | -2.902947910 | 8.825090661  |

PRIMCOORD

20 1

|    |               |               |               |
|----|---------------|---------------|---------------|
| Sb | 3.6407303410  | -2.3072216357 | 4.1415821641  |
| Sb | 6.5179744954  | -1.8323477579 | 7.8712608240  |
| Sb | 8.5167332197  | -1.5403090109 | 3.2424352386  |
| Sb | -0.3327982145 | 6.5897881304  | -0.2358152628 |
| Sb | 3.1528469046  | 0.8220935555  | 4.0965974353  |
| Sb | 6.9895340303  | -4.8505144027 | 7.9145833556  |
| Sb | 9.0040246039  | -4.6634323287 | 3.2872404303  |
| Sb | 0.1549656385  | 3.4646033093  | -0.1907366308 |
| Na | 4.3734285602  | 5.7744344064  | 1.9140434021  |
| Na | 9.1678047313  | -2.9433588253 | 9.2739664036  |
| Na | 6.4876300995  | -3.4386854060 | 4.8439121442  |
| Na | 0.1216821048  | 1.9441354726  | 5.8359205276  |
| Na | 13.7242479815 | 0.8469830689  | 0.6014731045  |
| Na | 8.5870142821  | 0.1636984204  | 9.1436224922  |
| Na | 6.3154592634  | -0.2566156468 | 5.1711486679  |
| Na | 0.5371755482  | 1.9780736574  | 2.6525326081  |
| Na | 1.0716118893  | -1.1402613070 | 2.7701947136  |
| Na | 9.5319763240  | -2.9499458870 | 6.0816291419  |
| Na | 3.1619480941  | 2.4685986641  | 7.1017947817  |
| Na | 3.4453253308  | -0.6966615743 | 6.8484188185  |

Na<sub>13</sub>Sb<sub>8</sub>:

PRIMVEC

|              |              |              |
|--------------|--------------|--------------|
| 10.133712153 | -0.012543375 | -0.562836111 |
| -0.020067045 | 6.458788848  | -0.146241815 |
| 0.537448434  | -3.025804152 | 8.836261650  |

PRIMCOORD

21 1

|    |              |               |               |
|----|--------------|---------------|---------------|
| Sb | 3.3056160188 | -2.6581599966 | 3.7849696837  |
| Sb | 6.1887506692 | 0.8766439862  | 7.9513699713  |
| Sb | 8.3767162657 | 0.5003140647  | 3.6332270591  |
| Sb | 0.5021110071 | 7.1915974246  | -0.2915010807 |
| Sb | 3.2954084018 | 0.7726193831  | 3.7078623256  |
| Sb | 6.1992704233 | -2.6588153605 | 8.0295798387  |
| Sb | 8.3848873821 | -2.4291072209 | 3.6979509493  |

|    |               |               |               |
|----|---------------|---------------|---------------|
| Sb | 0.5132567003  | 3.6774263994  | -0.2115650209 |
| Na | 5.7424268623  | 5.5020483050  | 2.3084168973  |
| Na | 6.0075788700  | 2.3155219984  | 4.8651261031  |
| Na | 5.0846052049  | 5.5574696502  | 5.5498536328  |
| Na | 3.0310382604  | 2.4011952282  | 6.5207025900  |
| Na | 9.3715636655  | 2.3560491472  | 6.0053604834  |
| Na | 3.1406244454  | 5.4601189351  | 0.7245219934  |
| Na | 8.2202622325  | 5.4419659173  | 0.3971180658  |
| Na | 11.5173932064 | -0.8650710187 | 5.2322782286  |
| Na | 8.5087042408  | -0.8691753217 | 6.6487254958  |
| Na | 0.7174769369  | -0.9444903336 | 2.7135298773  |
| Na | 7.2808610331  | 2.2262573363  | 1.2221231598  |
| Na | 10.7063078651 | 2.2754652324  | 2.2568386328  |
| Na | 3.4074497865  | 2.2258156631  | 0.7090647882  |

Na<sub>14</sub>Sb<sub>8</sub>:

PRIMVEC

|              |              |              |
|--------------|--------------|--------------|
| 10.314752329 | -0.030496394 | -0.563814529 |
| -0.029781519 | 6.451830179  | -0.156358784 |
| 0.542026008  | -3.071847670 | 8.853287666  |

PRIMCOORD

22 1

|    |               |               |               |
|----|---------------|---------------|---------------|
| Sb | 3.6570611305  | -0.1685244667 | 4.0190811256  |
| Sb | 6.3943607187  | -0.1664281044 | 8.1687688280  |
| Sb | 8.8236250228  | -0.0537478222 | 3.9233901979  |
| Sb | 0.8745629722  | 6.2407367189  | -0.4971951753 |
| Sb | 3.7386510685  | 3.0603943901  | 3.9373003983  |
| Sb | 6.4087416878  | -3.2847067035 | 8.2461325109  |
| Sb | 8.8441828146  | -3.2805970250 | 4.0023000729  |
| Sb | 0.8929154014  | 3.1231647159  | -0.4167145851 |
| Na | 6.2821356857  | 4.7502389691  | 4.8896131814  |
| Na | 3.8480165502  | 4.7098161162  | 6.8589673574  |
| Na | 6.3639652822  | 1.5189806798  | 5.3111356564  |
| Na | 9.0627678830  | 1.5029092397  | 6.9523981338  |
| Na | 3.8588307317  | 4.6145327132  | 1.1696764609  |
| Na | 7.4859466377  | 4.6483350783  | 1.4252274419  |
| Na | 11.4814614883 | -1.6938652094 | 5.0956668831  |
| Na | 8.9609906784  | -1.7271030979 | 6.9808812772  |
| Na | 0.8056120359  | -1.7134654564 | 2.5724845451  |
| Na | 1.1502266702  | 1.5636215548  | 5.1643659571  |
| Na | 6.1971996500  | 1.4109461536  | 2.2180057869  |
| Na | 3.7871287923  | 1.4905126534  | 6.8981052228  |
| Na | 9.6190953526  | 1.4631055779  | 1.2737144330  |
| Na | 2.9741152705  | 1.4192351545  | 1.3687544126  |

Na<sub>15</sub>Sb<sub>8</sub>:

PRIMVEC

|              |              |              |
|--------------|--------------|--------------|
| 10.265760018 | -0.053258464 | -0.558019098 |
| -0.044269507 | 6.532910477  | -0.158212303 |
| 0.567508765  | -3.075406085 | 8.967102307  |

PRIMCOORD

23 1

|    |               |               |               |
|----|---------------|---------------|---------------|
| Sb | 3.4816262338  | -2.6062668149 | 4.1363407237  |
| Sb | 6.1968022765  | 0.8451461432  | 8.3611555580  |
| Sb | 8.4915982730  | 0.2963707516  | 3.8910048534  |
| Sb | 0.3671747752  | 6.9388347079  | -0.4840056683 |
| Sb | 3.3678139090  | 0.5181870306  | 4.1670222725  |
| Sb | 6.0077430733  | -2.5290185123 | 8.4648871058  |
| Sb | 8.4115199215  | -2.7650964721 | 3.9703772637  |
| Sb | 0.4971988063  | 3.8442321145  | -0.3176469027 |
| Na | 5.7532634738  | 5.6415944269  | 2.3640634169  |
| Na | 5.8850303870  | 2.3543753214  | 2.1616769794  |
| Na | 5.9947505952  | 5.4076792471  | 5.3964386947  |
| Na | 3.3357178963  | 2.4928717347  | 6.8773402000  |
| Na | 5.9687487487  | 2.1379881084  | 5.3353812023  |
| Na | 8.7590334502  | 2.1944020766  | 6.5919949222  |
| Na | 3.1418926899  | 5.3169538736  | 0.9337891816  |
| Na | 8.2072168911  | 5.3402489579  | 0.6851671665  |
| Na | 11.0953711353 | -1.0704705555 | 5.3170464817  |
| Na | 8.6060136808  | -1.0163618431 | 7.2635869073  |
| Na | 0.7137373514  | -1.1382108330 | 2.8267566261  |
| Na | 0.8246972678  | 2.2342369175  | 4.9206389723  |
| Na | 9.2692310351  | 2.0633629283  | 1.3610947947  |
| Na | 3.5567674127  | -0.7576632275 | 7.2822711750  |
| Na | 2.5878142488  | 2.0547094378  | 1.4897644888  |

Na<sub>16</sub>Sb<sub>8</sub>:

PRIMVEC

|              |              |              |
|--------------|--------------|--------------|
| 10.299445368 | 0.016950418  | -0.610610600 |
| 0.002040696  | 6.774678805  | -0.170202864 |
| 0.506679824  | -3.198470162 | 9.050450911  |

PRIMCOORD

24 1

|    |              |               |               |
|----|--------------|---------------|---------------|
| Sb | 3.3335311052 | -1.7331156053 | 4.1439496022  |
| Sb | 6.1616911566 | 0.3750275077  | 8.4309249499  |
| Sb | 8.4896451460 | -0.0725433749 | 3.9029099182  |
| Sb | 0.5115531725 | 7.1677895888  | -0.4047213580 |
| Sb | 3.3350856223 | 1.6547828856  | 4.0582107632  |

|    |               |               |               |
|----|---------------|---------------|---------------|
| Sb | 6.2562691839  | -3.0111744658 | 8.5130607786  |
| Sb | 8.4885468137  | -3.4594937051 | 3.9857624676  |
| Sb | 0.5042852913  | 3.7800290412  | -0.3198565235 |
| Na | 5.6224937021  | 6.6989373614  | 2.4293960199  |
| Na | 5.6189280713  | 3.3092119950  | 2.5167337899  |
| Na | 6.2023444854  | 5.0411517597  | 5.4191801666  |
| Na | 3.5036184065  | 3.3790300779  | 6.7596505034  |
| Na | 6.2038253715  | 1.6514626089  | 5.5089177069  |
| Na | 8.7575440499  | 2.5914698684  | 6.9906937045  |
| Na | 3.1904543584  | 5.1943760027  | 0.6966885021  |
| Na | 8.2944161580  | 4.9170442407  | 0.9714247580  |
| Na | 10.9623603811 | -1.7401879621 | 5.2394812127  |
| Na | 8.7199596643  | -0.7892979472 | 7.0998173206  |
| Na | 0.8970459534  | -0.1149415792 | 2.8297330270  |
| Na | 0.6725015890  | 1.6297494564  | 5.7546984983  |
| Na | 8.3217965182  | 1.5262879111  | 1.0694063116  |
| Na | 3.4679484069  | -0.0099015668 | 6.8286731249  |
| Na | 11.1976077762 | 3.2929958967  | 2.1318752707  |
| Na | 3.2029395102  | 1.8035927382  | 0.7753114802  |

**Fast Na diffusion path in Na<sub>14</sub>Sb<sub>8</sub> under no constraint (in .axsf format):**

ANIMSTEPS 17

CRYSTAL

PRIMVEC

10.3147523290 -0.0304963940 -0.5638145290

-0.0297815190 6.4518301790 -0.1563587840

0.5420260080 -3.0718476700 8.8532876660

PRIMCOORD 1

22 1

|    |              |               |               |
|----|--------------|---------------|---------------|
| Sb | 3.6570611305 | -0.1685244667 | 4.0190811256  |
| Sb | 6.3943607187 | -0.1664281044 | 8.1687688280  |
| Sb | 8.8236250228 | -0.0537478222 | 3.9233901979  |
| Sb | 0.8745629722 | 6.2407367189  | -0.4971951753 |
| Sb | 3.7386510685 | 3.0603943901  | 3.9373003983  |
| Sb | 6.4087416878 | -3.2847067035 | 8.2461325109  |
| Sb | 8.8441828146 | -3.2805970250 | 4.0023000729  |
| Sb | 0.8929154014 | 3.1231647159  | -0.4167145851 |
| Na | 6.2821356857 | 4.7502389691  | 4.8896131814  |
| Na | 3.8480165502 | 4.7098161162  | 6.8589673574  |
| Na | 6.3639652822 | 1.5189806798  | 5.3111356564  |
| Na | 9.0627678830 | 1.5029092397  | 6.9523981338  |
| Na | 3.8588307317 | 4.6145327132  | 1.1696764609  |
| Na | 7.4859466377 | 4.6483350783  | 1.4252274419  |

|    |               |               |              |
|----|---------------|---------------|--------------|
| Na | 11.4814614883 | -1.6938652094 | 5.0956668831 |
| Na | 8.9609906784  | -1.7271030979 | 6.9808812772 |
| Na | 0.8056120359  | -1.7134654564 | 2.5724845451 |
| Na | 1.1502266702  | 1.5636215548  | 5.1643659571 |
| Na | 6.1971996500  | 1.4109461536  | 2.2180057869 |
| Na | 3.7871287923  | 1.4905126534  | 6.8981052228 |
| Na | 9.6190953526  | 1.4631055779  | 1.2737144330 |
| Na | 2.9741152705  | 1.4192351545  | 1.3687544126 |

PRIMCOORD 2

22 1

|    |               |               |               |
|----|---------------|---------------|---------------|
| Sb | 3.6583731915  | -0.1659301368 | 4.0173820811  |
| Sb | 6.3967394793  | -0.1663036912 | 8.1668546444  |
| Sb | 8.8293547807  | -0.0548471663 | 3.9231787048  |
| Sb | 0.8813600258  | 6.2415662280  | -0.4965063673 |
| Sb | 3.7400398944  | 3.0568161116  | 3.9344348309  |
| Sb | 6.4107784594  | -3.2849087164 | 8.2447888371  |
| Sb | 8.8505376191  | -3.2796393501 | 4.0025305644  |
| Sb | 0.8978924611  | 3.1234914329  | -0.4167567827 |
| Na | 6.3085071279  | 4.7509918884  | 4.8598418186  |
| Na | 3.8681547814  | 4.7064854066  | 6.8086285287  |
| Na | 6.3690595820  | 1.5195458220  | 5.2979991382  |
| Na | 9.0788515000  | 1.5030286114  | 6.9010486483  |
| Na | 3.9504442831  | 4.6067555138  | 1.2022110799  |
| Na | 7.6389828999  | 4.6566809828  | 1.3333452859  |
| Na | 11.4785402554 | -1.6941658007 | 5.1015749785  |
| Na | 8.9909674254  | -1.7285759066 | 7.0643755191  |
| Na | 0.9085029895  | -1.7154830053 | 2.5816529803  |
| Na | 1.1784377801  | 1.5611123952  | 5.2039776132  |
| Na | 6.3456632054  | 1.4263864163  | 2.1861684960  |
| Na | 3.8133317846  | 1.4885056417  | 6.9169421864  |
| Na | 9.9013919292  | 1.4737513006  | 1.3933034589  |
| Na | 3.1599854354  | 1.3994446272  | 1.2725351282  |

PRIMCOORD 3

22 1

|    |              |               |               |
|----|--------------|---------------|---------------|
| Sb | 3.6585132335 | -0.1643864954 | 4.0153705088  |
| Sb | 6.3994764311 | -0.1647847197 | 8.1637414480  |
| Sb | 8.8372134682 | -0.0550103611 | 3.9219221177  |
| Sb | 0.8865342683 | 6.2419753866  | -0.4961775764 |
| Sb | 3.7418096208 | 3.0552246357  | 3.9315741956  |
| Sb | 6.4138768418 | -3.2860136528 | 8.2413214206  |
| Sb | 8.9441832537 | -3.2777731969 | 3.9959673040  |
| Sb | 0.9012836649 | 3.1236808192  | -0.4174093747 |
| Na | 6.3482110804 | 4.7388906066  | 4.8228341669  |
| Na | 3.8868298229 | 4.7081307264  | 6.7722413310  |

|    |               |               |              |
|----|---------------|---------------|--------------|
| Na | 6.3765538612  | 1.5206069058  | 5.2517399469 |
| Na | 9.0720687603  | 1.5061789745  | 6.8720101209 |
| Na | 3.9953228995  | 4.6041907163  | 1.2138509868 |
| Na | 7.7377093604  | 4.6573851302  | 1.2877982893 |
| Na | 11.4921317614 | -1.6885054603 | 5.1004781722 |
| Na | 9.0146417183  | -1.7226900411 | 7.1222018449 |
| Na | 0.9695935229  | -1.7205965398 | 2.5753966391 |
| Na | 1.2163919247  | 1.5546203366  | 5.2867121993 |
| Na | 6.5364985590  | 1.4466195315  | 2.1120177744 |
| Na | 3.8437276562  | 1.4896494156  | 6.9247056148 |
| Na | 10.2164968820 | 1.4652066850  | 1.5233082722 |
| Na | 3.3105029050  | 1.3887278362  | 1.2153915894 |

PRIMCOORD 4

22 1

|    |               |               |               |
|----|---------------|---------------|---------------|
| Sb | 3.6569465868  | -0.1647134938 | 4.0142264457  |
| Sb | 6.4007741646  | -0.1628315460 | 8.1588984592  |
| Sb | 8.9287971048  | -0.0555291825 | 3.9158898808  |
| Sb | 0.8893292980  | 6.2416672344  | -0.4946799976 |
| Sb | 3.7358861940  | 3.0558928510  | 3.9313527632  |
| Sb | 6.4141594370  | -3.2890701730 | 8.2383109910  |
| Sb | 8.9471116700  | -3.2787592972 | 3.9949997941  |
| Sb | 0.9037337400  | 3.1230719914  | -0.4162628333 |
| Na | 6.3672553662  | 4.7548438420  | 4.8167630338  |
| Na | 3.8849499324  | 4.7050018298  | 6.7678366670  |
| Na | 6.3775703503  | 1.5226917636  | 5.1691570976  |
| Na | 9.0423368180  | 1.4995367720  | 6.8700306131  |
| Na | 3.9644450605  | 4.5961220927  | 1.2012321083  |
| Na | 7.7355476680  | 4.6614991432  | 1.2924014322  |
| Na | 11.5006519828 | -1.6956265121 | 5.0967565102  |
| Na | 9.0287047697  | -1.7266995807 | 7.1541305350  |
| Na | 0.9496583307  | -1.7124682528 | 2.5676376559  |
| Na | 1.2334422862  | 1.5604464166  | 5.3740288012  |
| Na | 6.7806867594  | 1.4464166994  | 1.9896950700  |
| Na | 3.8721490978  | 1.4831524851  | 6.9159898649  |
| Na | 10.5185914456 | 1.4803572759  | 1.6388361014  |
| Na | 3.4608968564  | 1.3739771974  | 1.1963622555  |

PRIMCOORD 5

22 1

|    |              |               |               |
|----|--------------|---------------|---------------|
| Sb | 3.6535286520 | -0.1653372701 | 4.0156913426  |
| Sb | 6.4072898431 | -0.1586118461 | 8.1513607978  |
| Sb | 8.9334585088 | -0.0557418566 | 3.9139228806  |
| Sb | 0.8901255306 | 6.1541121023  | -0.4883699688 |
| Sb | 3.6432611638 | 3.1219012287  | 4.0182580260  |
| Sb | 6.4180513071 | -3.2907607948 | 8.2327712529  |

|    |               |               |               |
|----|---------------|---------------|---------------|
| Sb | 8.9488388232  | -3.2784685043 | 3.9929606944  |
| Sb | 0.9057923487  | 3.1182716873  | -0.4142621855 |
| Na | 6.3638120331  | 4.7692070857  | 4.8241354681  |
| Na | 3.8718602174  | 4.7192352474  | 6.8151975411  |
| Na | 6.3534839751  | 1.5421828416  | 5.0540130128  |
| Na | 9.0083536824  | 1.4944366857  | 6.8525848502  |
| Na | 3.9482280502  | 4.5970926272  | 1.2027126471  |
| Na | 7.7272112398  | 4.6684562632  | 1.2939545946  |
| Na | 11.5009851003 | -1.6997406184 | 5.1018108115  |
| Na | 9.0472155941  | -1.7348341488 | 7.1306848888  |
| Na | 0.9226434524  | -1.7204661329 | 2.5744666714  |
| Na | 1.2229574843  | 1.5511087636  | 5.4216800530  |
| Na | 7.0517203516  | 1.4448972172  | 1.8248227910  |
| Na | 3.9027889248  | 1.4862405470  | 6.9031170662  |
| Na | 10.7414346643 | 1.4680707393  | 1.7092125641  |
| Na | 3.6035878431  | 1.3863292184  | 1.2370125914  |

PRIMCOORD 6

22 1

|    |               |               |               |
|----|---------------|---------------|---------------|
| Sb | 3.6513529791  | -0.1996652752 | 4.1009354772  |
| Sb | 6.4834380368  | -0.1278817729 | 8.0641208142  |
| Sb | 8.9350465248  | -0.0554858189 | 3.9119576156  |
| Sb | 0.8892836201  | 6.1553026700  | -0.4850288987 |
| Sb | 3.6373944326  | 3.1235132521  | 4.0196143487  |
| Sb | 6.4149114437  | -3.2909216738 | 8.2329495116  |
| Sb | 8.9485311771  | -3.2788208685 | 3.9926471639  |
| Sb | 0.9063221677  | 3.1172583658  | -0.4107110505 |
| Na | 6.3583000049  | 4.7604962430  | 4.8616772823  |
| Na | 3.8591368999  | 4.7241506301  | 6.8699150885  |
| Na | 6.3383382142  | 1.5322877102  | 4.9575962930  |
| Na | 8.9991568284  | 1.5044640140  | 6.8637798744  |
| Na | 3.8908810267  | 4.5872890387  | 1.1856726409  |
| Na | 7.6147199074  | 4.6799291108  | 1.3556219286  |
| Na | 11.4988792420 | -1.7050445659 | 5.0992004030  |
| Na | 9.0608505922  | -1.7374850177 | 7.0834692865  |
| Na | 0.8528692181  | -1.7173724584 | 2.5655915614  |
| Na | 1.2103843748  | 1.5481199777  | 5.4619519966  |
| Na | 7.3125488589  | 1.4625588309  | 1.6488174945  |
| Na | 3.9128982191  | 1.4915129188  | 6.9012517327  |
| Na | 10.9059872921 | 1.4713706885  | 1.7641975211  |
| Na | 3.7689374175  | 1.3708711176  | 1.3015456485  |

PRIMCOORD 7

22 1

|    |              |               |              |
|----|--------------|---------------|--------------|
| Sb | 3.6500619936 | -0.2014713873 | 4.1008140705 |
| Sb | 6.4840826961 | -0.1276692645 | 8.0647007710 |

|    |               |               |               |
|----|---------------|---------------|---------------|
| Sb | 8.9369516701  | -0.0547952695 | 3.9124223078  |
| Sb | 0.8896269384  | 6.1566685442  | -0.4841265538 |
| Sb | 3.6360000503  | 3.1256387495  | 4.0199917306  |
| Sb | 6.4172779936  | -3.2920782200 | 8.2313618187  |
| Sb | 8.9498937394  | -3.2800914800 | 3.9926377543  |
| Sb | 0.9062660737  | 3.1157773271  | -0.4098536731 |
| Na | 6.3548411049  | 4.7567210780  | 4.9106958092  |
| Na | 3.8491159205  | 4.7223907362  | 6.8991767469  |
| Na | 6.3435856093  | 1.5282627955  | 4.8848685750  |
| Na | 8.9912497872  | 1.5095682179  | 6.9051101899  |
| Na | 3.7918210823  | 4.5993346261  | 1.1553173378  |
| Na | 7.4197296901  | 4.6767841313  | 1.4799850876  |
| Na | 11.5128665600 | -1.7062397516 | 5.0838567764  |
| Na | 9.0706780404  | -1.7319693408 | 7.0246782916  |
| Na | 0.7590817940  | -1.7203515284 | 2.5455889875  |
| Na | 1.2029400119  | 1.5479203943  | 5.4903160548  |
| Na | 7.5618530834  | 1.4527124490  | 1.4987636364  |
| Na | 3.9278273928  | 1.4890157500  | 6.8824120984  |
| Na | 11.0707718080 | 1.4648045373  | 1.8073111797  |
| Na | 3.9173032486  | 1.3849414575  | 1.3401592098  |

PRIMCOORD 8

22 1

|    |               |               |               |
|----|---------------|---------------|---------------|
| Sb | 3.5586709412  | -0.2003782800 | 4.1076761737  |
| Sb | 6.4838361936  | -0.1260672904 | 8.0640793225  |
| Sb | 8.9321098975  | -0.1453434783 | 3.9158227787  |
| Sb | 0.8865878903  | 6.1584313700  | -0.4838774652 |
| Sb | 3.6329902485  | 3.1287201009  | 4.0226493605  |
| Sb | 6.4984515688  | -3.2909550310 | 8.2237602225  |
| Sb | 8.9477032799  | -3.2814317630 | 3.9915129476  |
| Sb | 0.9002397325  | 3.1175987020  | -0.4096872285 |
| Na | 6.3047490685  | 4.7564930865  | 4.9272079607  |
| Na | 3.8413341437  | 4.7382513842  | 6.9553993216  |
| Na | 6.3429383875  | 1.5175055484  | 4.8294746706  |
| Na | 8.9848361837  | 1.5184514708  | 6.9155928721  |
| Na | 3.7229346039  | 4.6213796146  | 1.1353259435  |
| Na | 7.3052123939  | 4.6670681864  | 1.5394927883  |
| Na | 11.5162023552 | -1.7162427972 | 5.0895068049  |
| Na | 9.0647347194  | -1.7156948960 | 6.9662657259  |
| Na | 0.6904249090  | -1.7133391991 | 2.5295977454  |
| Na | 1.1642324612  | 1.5483054435  | 5.5071701384  |
| Na | 7.8164538288  | 1.4444709922  | 1.3755733147  |
| Na | 3.9308754080  | 1.5108796935  | 6.8698044523  |
| Na | 11.2400738591 | 1.4714545719  | 1.8251035012  |
| Na | 4.1435602331  | 1.4055326638  | 1.4242338739  |



PRIMCOORD 9

22 1

|    |               |               |               |
|----|---------------|---------------|---------------|
| Sb | 3.5588597473  | -0.2017886065 | 4.1090242320  |
| Sb | 6.4871781330  | -0.1252992114 | 8.0639003598  |
| Sb | 8.9306279731  | -0.1456236023 | 3.9145375486  |
| Sb | 0.8821903545  | 6.1584047845  | -0.4859684853 |
| Sb | 3.6355247445  | 3.1310145889  | 4.0250188822  |
| Sb | 6.5067227960  | -3.2915646277 | 8.2271028947  |
| Sb | 8.9465765327  | -3.2831199002 | 3.9896520781  |
| Sb | 0.8958107835  | 3.1174983710  | -0.4117300133 |
| Na | 6.2850533169  | 4.7558480386  | 4.9465679140  |
| Na | 3.8414008839  | 4.7417867514  | 7.0214280071  |
| Na | 6.3526439408  | 1.5149157869  | 4.8184446874  |
| Na | 8.9857909716  | 1.5208599480  | 6.9308867491  |
| Na | 3.6535035683  | 4.6287001505  | 1.1141298902  |
| Na | 7.1895603780  | 4.6565434691  | 1.6126601947  |
| Na | 11.5323202674 | -1.7200036170 | 5.0755623324  |
| Na | 9.0583642008  | -1.7090421028 | 6.8953481925  |
| Na | 0.6063566636  | -1.7156478458 | 2.5007844436  |
| Na | 1.1515122882  | 1.5465511967  | 5.5049409781  |
| Na | 8.0565680685  | 1.4360930548  | 1.2471689630  |
| Na | 3.9352396273  | 1.5163721349  | 6.8567535680  |
| Na | 11.4208856907 | 1.4686375938  | 1.8090545650  |
| Na | 4.4076796360  | 1.4127379391  | 1.5339396483  |

PRIMCOORD 10

22 1

|    |               |               |               |
|----|---------------|---------------|---------------|
| Sb | 3.5595742568  | -0.2034181410 | 4.1101733585  |
| Sb | 6.4971661564  | -0.1527583839 | 8.1453147422  |
| Sb | 8.8477367297  | -0.1432256406 | 3.9155298990  |
| Sb | 0.8694178200  | 6.1895576374  | -0.5602248696 |
| Sb | 3.6400393406  | 3.1319099523  | 4.0269135096  |
| Sb | 6.5105962873  | -3.2935649441 | 8.2244885667  |
| Sb | 8.9458742366  | -3.2846122263 | 3.9865349141  |
| Sb | 0.8923199347  | 3.1203669203  | -0.4168131166 |
| Na | 6.2627636082  | 4.7572690387  | 4.9684168791  |
| Na | 3.8518337191  | 4.7482199225  | 7.0804738405  |
| Na | 6.3552763416  | 1.5357410305  | 4.8695037619  |
| Na | 8.9861785727  | 1.5148147791  | 6.9445316840  |
| Na | 3.6246965447  | 4.6174230194  | 1.1041026167  |
| Na | 7.1319590765  | 4.6479773057  | 1.6485888582  |
| Na | 11.5378779387 | -1.7219618677 | 5.0401581926  |
| Na | 9.0469003032  | -1.7091317541 | 6.8414356367  |
| Na | 0.5395801258  | -1.6915576598 | 2.4591639499  |
| Na | 1.1313663721  | 1.5314817632  | 5.4661250323  |

|    |               |              |              |
|----|---------------|--------------|--------------|
| Na | 8.2613328583  | 1.4289078780 | 1.1547056603 |
| Na | 3.9330424834  | 1.5149527993 | 6.8512006436 |
| Na | 11.6090504513 | 1.4771596048 | 1.7430731088 |
| Na | 4.6789914778  | 1.3971607211 | 1.6743178395 |

PRIMCOORD 11

22 1

|    |               |               |               |
|----|---------------|---------------|---------------|
| Sb | 3.5542830148  | -0.1774250542 | 4.0278028180  |
| Sb | 6.4974567448  | -0.1565171194 | 8.1490852026  |
| Sb | 8.8344501671  | -0.0534437416 | 3.9144855155  |
| Sb | 0.8634564344  | 6.1858399954  | -0.5727155204 |
| Sb | 3.6406326298  | 3.1319584251  | 4.0288798499  |
| Sb | 6.5120732765  | -3.2949821627 | 8.2259310541  |
| Sb | 8.8746871598  | -3.2966843573 | 3.9819663044  |
| Sb | 0.8888103307  | 3.1188566843  | -0.4182977715 |
| Na | 6.2345547394  | 4.7650862341  | 4.9695419911  |
| Na | 3.8542963086  | 4.7240378142  | 7.1336836608  |
| Na | 6.3418067682  | 1.5383679061  | 4.9820856198  |
| Na | 8.9967378149  | 1.4978220392  | 6.9805011617  |
| Na | 3.6189380690  | 4.6008678552  | 1.0953561512  |
| Na | 7.1143187639  | 4.6576956947  | 1.6653992813  |
| Na | 11.5401943289 | -1.7186874441 | 5.0226329678  |
| Na | 9.0288185472  | -1.7273726949 | 6.7942469421  |
| Na | 0.4993044521  | -1.7011353569 | 2.4648693947  |
| Na | 1.1178860997  | 1.5394329870  | 5.4311784745  |
| Na | 8.4396212093  | 1.4328501746  | 1.0681999288  |
| Na | 3.9056589791  | 1.4846458218  | 6.8449830397  |
| Na | 11.7847765149 | 1.4582177278  | 1.6621251022  |
| Na | 4.9742200275  | 1.4020876187  | 1.8037228746  |

PRIMCOORD 12

22 1

|    |              |               |               |
|----|--------------|---------------|---------------|
| Sb | 3.5566381902 | -0.1754407208 | 4.0251484733  |
| Sb | 6.4941140677 | -0.1594586946 | 8.1516489439  |
| Sb | 8.8286480968 | -0.0507635848 | 3.9126375107  |
| Sb | 0.7745251048 | 6.1844766418  | -0.5750089370 |
| Sb | 3.6425102342 | 3.1306383197  | 4.0292156749  |
| Sb | 6.5088429141 | -3.2926241738 | 8.2286739638  |
| Sb | 8.8507304792 | -3.2898100370 | 3.9869560920  |
| Sb | 0.7961485681 | 3.1201500006  | -0.4145392977 |
| Na | 6.2131569778 | 4.7694744579  | 4.9462637539  |
| Na | 3.8353161755 | 4.7122930801  | 7.1941068465  |
| Na | 6.3401678001 | 1.5419720245  | 5.0697397999  |
| Na | 8.9770400989 | 1.4974030577  | 6.9470415896  |
| Na | 3.6606263336 | 4.5975803975  | 1.1018430470  |
| Na | 7.1934815237 | 4.6595285000  | 1.6155851755  |

|    |               |               |              |
|----|---------------|---------------|--------------|
| Na | 11.5435221975 | -1.7107018109 | 5.0304846632 |
| Na | 8.9959071756  | -1.7273558300 | 6.7681573328 |
| Na | 0.5364550814  | -1.7057393847 | 2.4874646926 |
| Na | 1.1079522922  | 1.5499634993  | 5.3740610115 |
| Na | 8.6152570243  | 1.4357440493  | 1.0185157005 |
| Na | 3.8533396555  | 1.4730470242  | 6.8584369039 |
| Na | 11.9817213036 | 1.4444110685  | 1.5452406880 |
| Na | 5.2462299086  | 1.4054440191  | 1.9301938184 |

PRIMCOORD 13

22 1

|    |               |               |               |
|----|---------------|---------------|---------------|
| Sb | 3.6472046415  | -0.1758517270 | 4.0229436771  |
| Sb | 6.4926118756  | -0.1625992836 | 8.1564830943  |
| Sb | 8.8246518451  | -0.0504362164 | 3.9122940749  |
| Sb | 0.7671489811  | 6.1830658392  | -0.5770439261 |
| Sb | 3.6433486384  | 3.1298318886  | 4.0289216689  |
| Sb | 6.4190359649  | -3.2916078020 | 8.2351704551  |
| Sb | 8.8409765981  | -3.2880580860 | 3.9894056799  |
| Sb | 0.7920660623  | 3.1207342186  | -0.4155002805 |
| Na | 6.2160540442  | 4.7579717020  | 4.9396429597  |
| Na | 3.8166238282  | 4.7203026116  | 7.1776700322  |
| Na | 6.3392504286  | 1.5369165267  | 5.1606130673  |
| Na | 8.9686106870  | 1.5011675730  | 6.9475603856  |
| Na | 3.6835824771  | 4.5888474240  | 1.1147812341  |
| Na | 7.2313320705  | 4.6741986867  | 1.5746985222  |
| Na | 11.5395412649 | -1.6971194300 | 5.0311790065  |
| Na | 8.9603771261  | -1.7336633993 | 6.7718702998  |
| Na | 0.5547431113  | -1.7210723638 | 2.4992178256  |
| Na | 1.1051027171  | 1.5555659697  | 5.3000868563  |
| Na | 8.7867979159  | 1.4487455674  | 1.0067318049  |
| Na | 3.8065802365  | 1.4726334814  | 6.8671205150  |
| Na | 12.2248686345 | 1.4161996989  | 1.4136016734  |
| Na | 5.5037929982  | 1.4226496829  | 2.0409678864  |

PRIMCOORD 14

22 1

|    |              |               |               |
|----|--------------|---------------|---------------|
| Sb | 3.6518330014 | -0.1735949310 | 4.0228390905  |
| Sb | 6.4024656976 | -0.1629033807 | 8.1636361934  |
| Sb | 8.8216522060 | -0.0507964582 | 3.9152507213  |
| Sb | 0.7669786460 | 6.1819884020  | -0.5773377864 |
| Sb | 3.6460755082 | 3.1290796987  | 4.0298194648  |
| Sb | 6.4148270840 | -3.2879762458 | 8.2405392902  |
| Sb | 8.8382585622 | -3.2858776859 | 3.9921035906  |
| Sb | 0.7903388310 | 3.1216418608  | -0.4146409018 |
| Na | 6.2243705455 | 4.7592050686  | 4.9197364694  |
| Na | 3.8067923579 | 4.7051942400  | 7.1107023539  |

|    |               |               |              |
|----|---------------|---------------|--------------|
| Na | 6.3385731035  | 1.5377870410  | 5.2220229953 |
| Na | 8.9710560193  | 1.4957488587  | 6.9494673988 |
| Na | 3.7428088894  | 4.6007934629  | 1.1397696867 |
| Na | 7.3146125569  | 4.6647803661  | 1.5187105732 |
| Na | 11.5195958135 | -1.6885171179 | 5.0530267334 |
| Na | 8.9283203768  | -1.7310266862 | 6.8040002864 |
| Na | 0.6288069709  | -1.7189588449 | 2.5270861547 |
| Na | 1.1092175846  | 1.5622045103  | 5.2390101178 |
| Na | 8.9738406642  | 1.4436742862  | 1.0393912907 |
| Na | 3.7796783893  | 1.4688536405  | 6.8824647267 |
| Na | 12.4855527513 | 1.4089038646  | 1.2568210743 |
| Na | 5.7098264491  | 1.4261455180  | 2.1256698060 |

PRIMCOORD 15

22 1

|    |               |               |               |
|----|---------------|---------------|---------------|
| Sb | 3.6541115817  | -0.1735388680 | 4.0225974134  |
| Sb | 6.3985451718  | -0.1653173106 | 8.1656904467  |
| Sb | 8.8185050769  | -0.0525316310 | 3.9176753873  |
| Sb | 0.7712988293  | 6.2398674865  | -0.4939530913 |
| Sb | 3.6466456896  | 3.1282681602  | 4.0299541067  |
| Sb | 6.4101752054  | -3.2873460166 | 8.2422320480  |
| Sb | 8.8366364236  | -3.2853089261 | 3.9942178818  |
| Sb | 0.8777332397  | 3.1239118378  | -0.4194014309 |
| Na | 6.2345195368  | 4.7489640127  | 4.8866049984  |
| Na | 3.8176649966  | 4.7008175019  | 7.0216819376  |
| Na | 6.3365257004  | 1.5227623571  | 5.2683215319  |
| Na | 9.0130121600  | 1.4855087564  | 6.9487724335  |
| Na | 3.7705061597  | 4.6031718362  | 1.1447747408  |
| Na | 7.3816751013  | 4.6559635765  | 1.4682296581  |
| Na | 11.4950399527 | -1.6985884869 | 5.0761414227  |
| Na | 8.9181229131  | -1.7400173352 | 6.8415011013  |
| Na | 0.6762669961  | -1.7200773743 | 2.5447994835  |
| Na | 1.1121115200  | 1.5529167074  | 5.1799568680  |
| Na | 9.1633510612  | 1.4531674613  | 1.0938416379  |
| Na | 3.7600447941  | 1.4859455601  | 6.8834616234  |
| Na | 12.7729014371 | 1.4140803770  | 1.1160913350  |
| Na | 5.8794966291  | 1.4111297446  | 2.1788284790  |

PRIMCOORD 16

22 1

|    |              |               |               |
|----|--------------|---------------|---------------|
| Sb | 3.6551834967 | -0.1715651405 | 4.0218853080  |
| Sb | 6.3952675899 | -0.1658170494 | 8.1682018127  |
| Sb | 8.8202221182 | -0.0527010287 | 3.9222055435  |
| Sb | 0.7773128703 | 6.2418223939  | -0.4931481725 |
| Sb | 3.7336998412 | 3.0650936425  | 3.9437724981  |
| Sb | 6.4063876610 | -3.2857167989 | 8.2452981551  |

|    |               |               |               |
|----|---------------|---------------|---------------|
| Sb | 8.8404458716  | -3.2814412307 | 3.9999104678  |
| Sb | 0.8865487990  | 3.1240686854  | -0.4172971588 |
| Na | 6.2579746723  | 4.7515882046  | 4.9029013309  |
| Na | 3.8241581089  | 4.7146128229  | 6.9363198904  |
| Na | 6.3501073246  | 1.5209861488  | 5.3006129515  |
| Na | 9.0270539257  | 1.4860216045  | 6.9689674328  |
| Na | 3.7993796412  | 4.6044885556  | 1.1525578989  |
| Na | 7.4026729840  | 4.6547371240  | 1.4685333274  |
| Na | 11.4900611957 | -1.6938993032 | 5.0869138869  |
| Na | 8.9311094317  | -1.7367726990 | 6.9081685614  |
| Na | 0.7350839008  | -1.7095742495 | 2.5628072110  |
| Na | 1.1322670771  | 1.5643110009  | 5.1570750513  |
| Na | 9.3747284475  | 1.4757510770  | 1.1848612442  |
| Na | 3.7592261969  | 1.5046815229  | 6.8937897152  |
| Na | 13.0320710370 | 1.3854685202  | 0.9403037158  |
| Na | 6.0434444346  | 1.4048574335  | 2.2065710558  |

PRIMCOORD 17

22 1

|    |               |               |               |
|----|---------------|---------------|---------------|
| Sb | 3.6570611305  | -0.1685244667 | 4.0190811256  |
| Sb | 6.3943607187  | -0.1664281044 | 8.1687688280  |
| Sb | 8.8236250228  | -0.0537478222 | 3.9233901979  |
| Sb | 0.8745629722  | 6.2407367189  | -0.4971951753 |
| Sb | 3.7386510685  | 3.0603943901  | 3.9373003983  |
| Sb | 6.4087416878  | -3.2847067035 | 8.2461325109  |
| Sb | 8.8441828146  | -3.2805970250 | 4.0023000729  |
| Sb | 0.8929154014  | 3.1231647159  | -0.4167145851 |
| Na | 6.2821356857  | 4.7502389691  | 4.8896131814  |
| Na | 3.8480165502  | 4.7098161162  | 6.8589673574  |
| Na | 6.3639652822  | 1.5189806798  | 5.3111356564  |
| Na | 9.0627678830  | 1.5029092397  | 6.9523981338  |
| Na | 3.8588307317  | 4.6145327132  | 1.1696764609  |
| Na | 7.4859466377  | 4.6483350783  | 1.4252274419  |
| Na | 11.4814614883 | -1.6938652094 | 5.0956668831  |
| Na | 8.9609906784  | -1.7271030979 | 6.9808812772  |
| Na | 0.8056120359  | -1.7134654564 | 2.5724845451  |
| Na | 1.1502266702  | 1.5636215548  | 5.1643659571  |
| Na | 9.6190953526  | 1.4631055779  | 1.2737144330  |
| Na | 3.7871287923  | 1.4905126534  | 6.8981052228  |
| Na | 13.2888675995 | 1.3887387605  | 0.8049398836  |
| Na | 6.1971996500  | 1.4109461536  | 2.2180057869  |
